# Supplementary material for: The Arctic AβPP mutation leads to Alzheimer’s disease pathology with highly variable topographic deposition of differentially truncated Aβ
Source: PubMed Central journal article supplement (PMC4226306; doi:10.1186/2051-5960-1-60), 2013-09-10
Supplement: 2051-5960-1-60-S5.pdf [file 2051-5960-1-60-S5.pdf]

Supplemental Table 1. A $\beta$  peptides detected in MALDI-TOF analyzes of immunoprecipitates from temporal cortex of Arctic AD Sw2 patient brain.

| A $\beta$ peptide sequence | A $\beta$ m/z predicted | IP: abA $\beta$ <sub>17-24</sub> /abA $\beta$ <sub>arc</sub> m/z_exp1 | IP: abA $\beta$ <sub>17-24</sub> /abA $\beta$ <sub>arc</sub> m/z_exp2 | IP: abA $\beta$ <sub>17-24</sub> /abA $\beta$ <sub>arc</sub> Relative Intensity_exp1 | IP: abA $\beta$ <sub>17-24</sub> /abA $\beta$ <sub>arc</sub> Relative Intensity_exp2 |
|----------------------------|-------------------------|-----------------------------------------------------------------------|-----------------------------------------------------------------------|--------------------------------------------------------------------------------------|--------------------------------------------------------------------------------------|
| 18-42wt                    | 2464.9                  | 2463,471                                                              | 2463,751                                                              | 0,156                                                                                | 0,151                                                                                |
| 17-43wt                    | 2679.2                  | 2678,310                                                              | 2678,711                                                              | 1,000                                                                                | 1,000                                                                                |
| 11pE-40arc*                | 3062.6                  | 3062,808                                                              | 3061,445                                                              | 0,222                                                                                | 0,200                                                                                |
| 11pE-42arc*                | 3246.8                  | 3246,181                                                              | 3245,964                                                              | 0,335                                                                                | 0,295                                                                                |
| 9-42arc                    | 3485.1                  | 3482,913                                                              | 3484,111                                                              | 0,460                                                                                | 0,450                                                                                |
| 7-40arc formylated         | 3531.0                  | 3530,302                                                              | 3530,275                                                              | 0,682                                                                                | 0,570                                                                                |
| 10-42wt formylated         | 3528.0                  | 3530,302                                                              | 3530,275                                                              | 0,682                                                                                | 0,570                                                                                |
| 6-40wt oxidized            | 3728.2                  | 3728,588                                                              | 3728,212                                                              | 0,109                                                                                | 0,114                                                                                |
| 5-40arc                    | 3796.3                  | 3792,777                                                              | 3792,398                                                              | 0,147                                                                                | 0,132                                                                                |
| 5-40wt oxidized            | 3884.4                  | 3886,251                                                              | 3886,635                                                              | 0,241                                                                                | 0,198                                                                                |
| 4-40arc                    | 3943.5                  | 3943,952                                                              | 3944,181                                                              | 0,438                                                                                | 0,409                                                                                |
| 5-42arc oxidized           | 3996.6                  | 3997,343                                                              | 3997,012                                                              | 0,322                                                                                | 0,280                                                                                |
| 3pE-40arc*                 | 4054.6                  | 4056,985                                                              | 4056,985                                                              | 0,163                                                                                | 0,204                                                                                |
| 1-40arc*                   | 4258.8                  | 4259,081                                                              | 4258,680                                                              | 0,140                                                                                | 0,123                                                                                |
| 1-42arc*                   | 4443.1                  | 4442,975                                                              | 4443,544                                                              | 0,438                                                                                | 0,375                                                                                |
| 1-45wt                     | 4828.5                  | 4828,407                                                              | 4828,767                                                              | 0,276                                                                                | 0,255                                                                                |

**Legend:** A $\beta$  peptides were measured in positive linear mode on AutoflexIII imager Bruker MALDI-TOF spectrometer in two independent experiments (named as exp1 and exp2). All *m/z* listed represent  $[M_{av}+H]^+$  ( $\pm 3$  Da), after smoothing and background subtraction. Extraction of A $\beta$  peptides was performed in 99% formic acid. Immunoprecipitation (IP) was performed with abA $\beta$ <sub>17-24</sub> (Mab4G8) and abA $\beta$ <sub>arc</sub> (Mab27) antibodies. Asterisks mark peaks labeled in **Figure 3e**. Molecular weight (*m/z*) in Daltons (Da). Relative intensities of the peaks in relation to the most intensive peak (A $\beta$ 17-43wt) were calculated with FlexAnalysis 3.4 software (Bruker Daltonics). The data from experiment 1 were presented in Philipson et al. *Neurobiol Aging* (2012), **33**: 1010 e1011-1013 [35].
